# Supplementary figures and images for: Molecular topology-driven benzocyclobutene-based ultralow dielectrics with copper-matched low thermal expansion
Source: Royal Society of Chemistry journal article supplement (doi:10.1039/d5im00051c), 2025-01-01

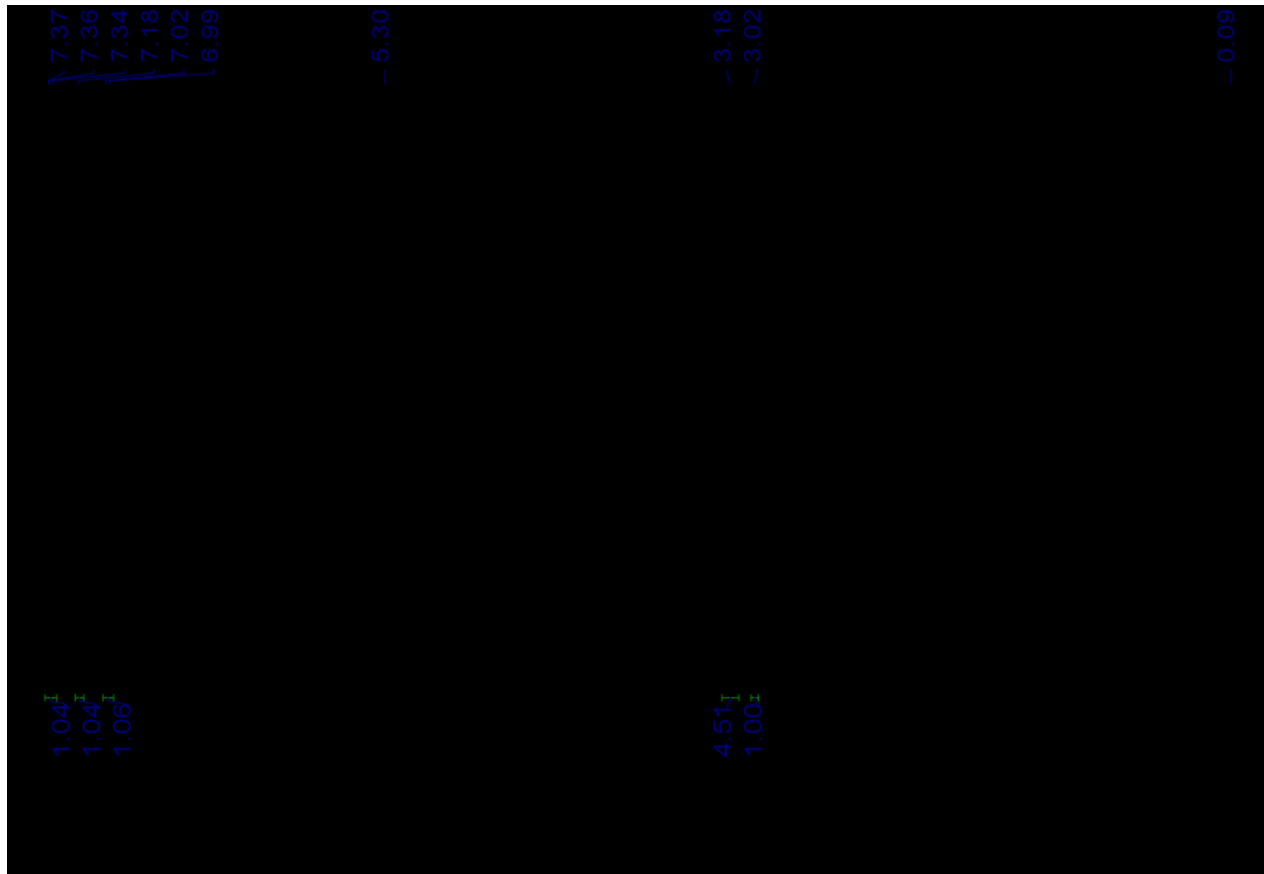

Supplement: d5im00051c1.pdf [file d5im00051c1.pdf]

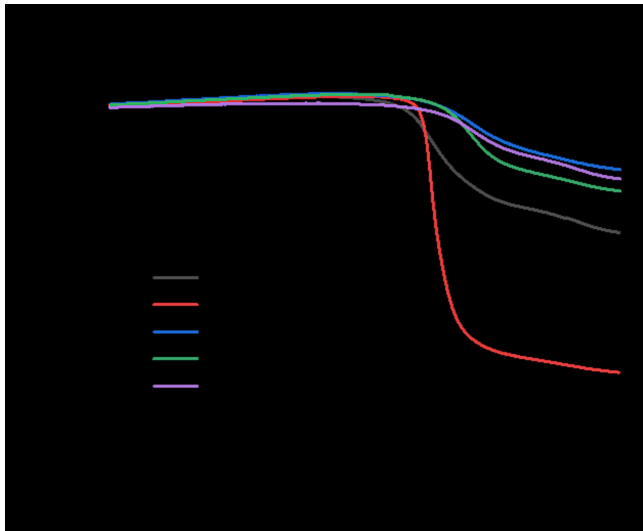

Supplement: d5im00051c10.pdf [file d5im00051c10.pdf]
